# Supplementary material for: Adsorption-induced co-assembly of hairy and isotropic particles
Source: Royal Society of Chemistry journal article supplement (doi:10.1039/c9cp06854f), 2020-01-01
Supplement: c9cp06854f1.pdf [file c9cp06854f1.pdf]

## Supplementary Information

### Adsorption-Induced Co-Assembly of Hairy and Isotropic Particles

Tomasz Staszewski and Małgorzata Borówko

*Department of Theoretical Chemistry, Institute of Chemical Sciences, Faculty of Chemistry,  
Maria Curie-Skłodowska University in Lublin, Poland  
E-mail: staszewski@umcs.pl*

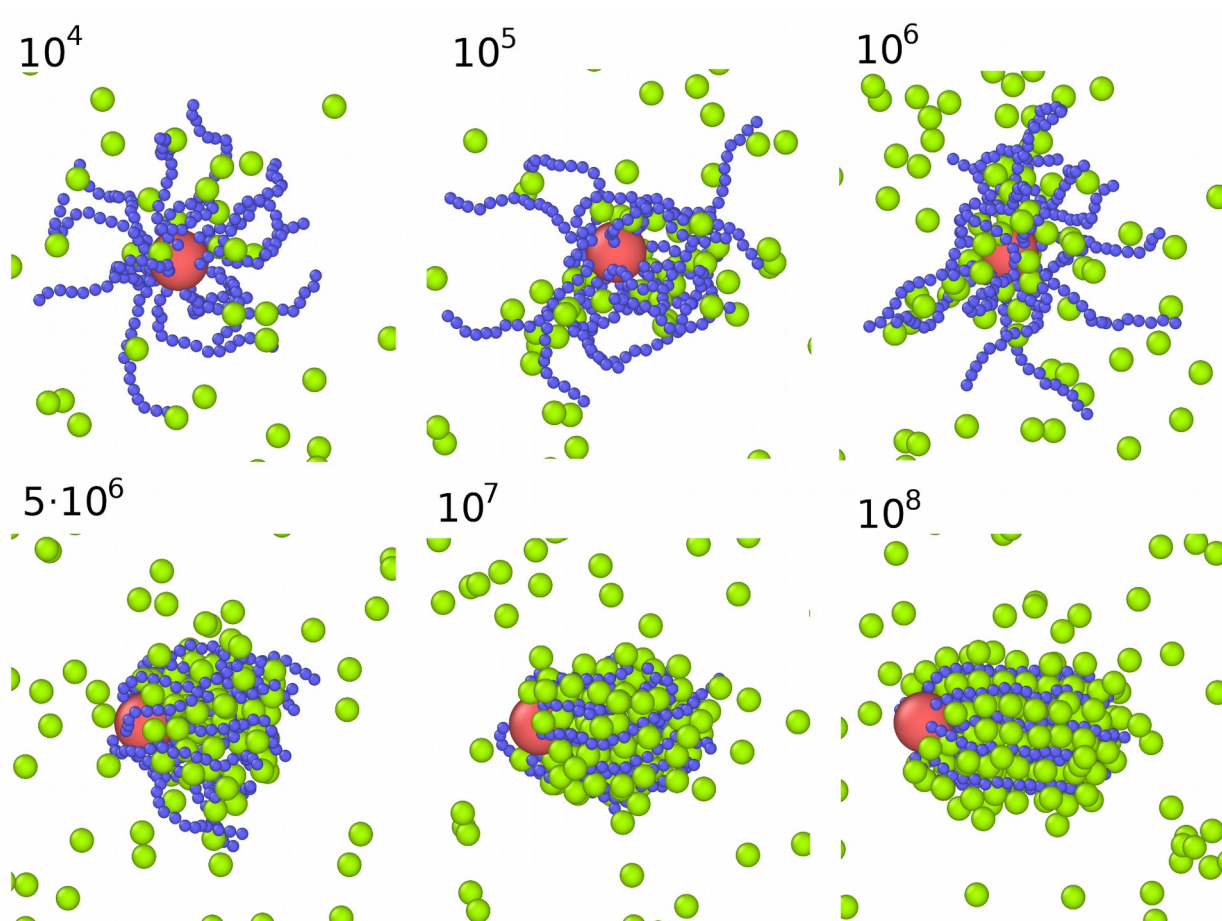

Figure S1. Time evolution of a single hairy particle immersed in the fluid F3 ( $\epsilon_{Fs} = 2.0$ ). The total reduced density of fluid particles is  $\rho_{Ft}^* = 0.001$ . The red sphere represent the core, blue and lemon spheres represent segments and fluid particles, respectively. The numbers of simulation steps are shown above each configuration.

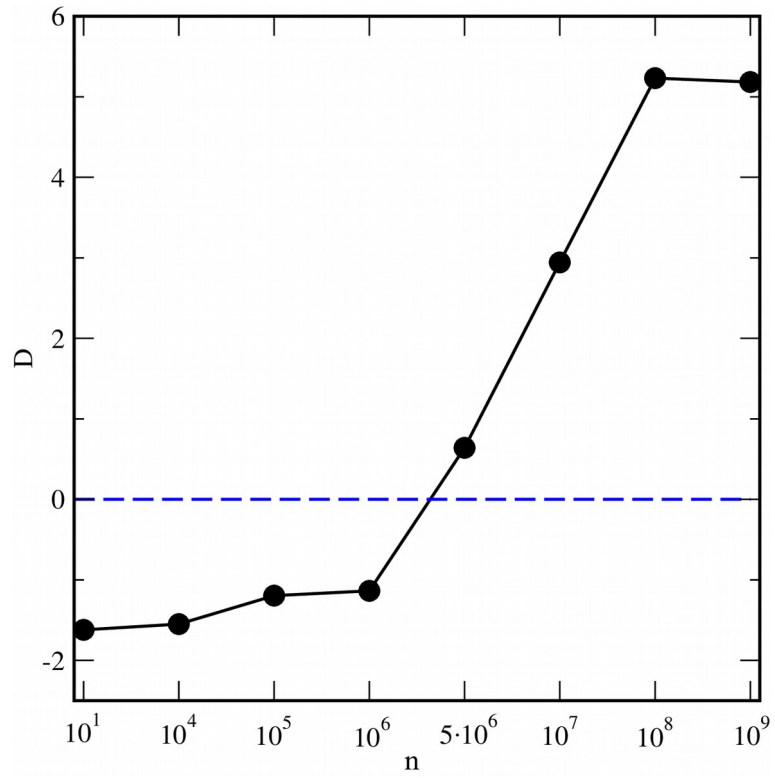

Figure S2. Dependence of the mass dipole moment on the number of simulation steps for the system from figure S1. Blue line is for  $D/\sigma = 0$ .
